# Supplementary material for: Self-standing polymer-functionalized reduced graphene oxide papers obtained via a UV-process
Source: Royal Society of Chemistry journal article supplement (doi:10.1039/c5ra21521h), 2015-01-01
Supplement: c5ra21521h1.pdf [file c5ra21521h1.pdf]

## Self-Standing polymer-functionalized reduced graphene oxide papers obtained by UV-process

Ignazio Roppolo<sup>1</sup>, Annalisa Chiappone<sup>1</sup>, Luca Boggione<sup>2</sup>, Micaela Castellino<sup>1</sup>, Katarzyna Bejtka<sup>1</sup>,  
Candido Fabrizio Pirri<sup>1,2</sup>, Marco Sangermano<sup>2</sup>, Alessandro Chiolerio<sup>1</sup>

<sup>1</sup>*Istituto Italiano di Tecnologia, Center for Space Human Robotics, Corso Trento 21, 10129 Torino, Italy*

<sup>2</sup>*Politecnico di Torino, Applied Science and Technology Department, Corso Duca degli Abruzzi 24, 10129 Torino, Italy*

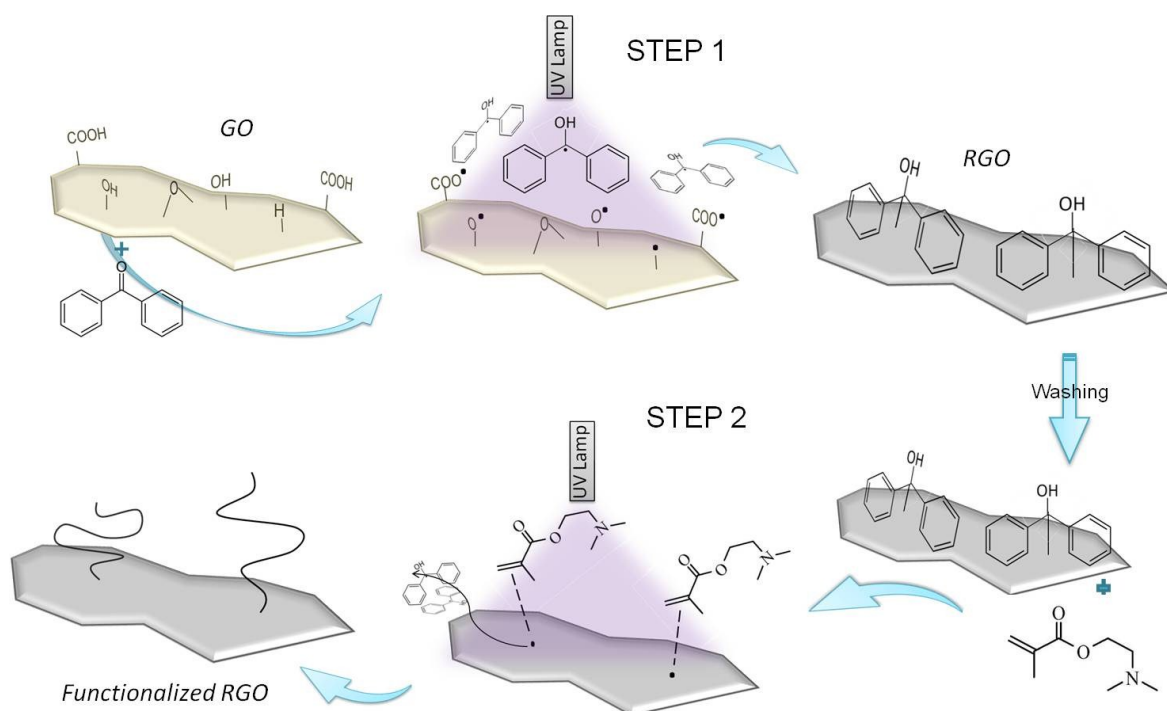

Figure S1 Scheme of the functionalization method utilized

<sup>1</sup> Corresponding Author.  
Tel. :+390110903407  
Email address: ignazio.roppolo@iit.it

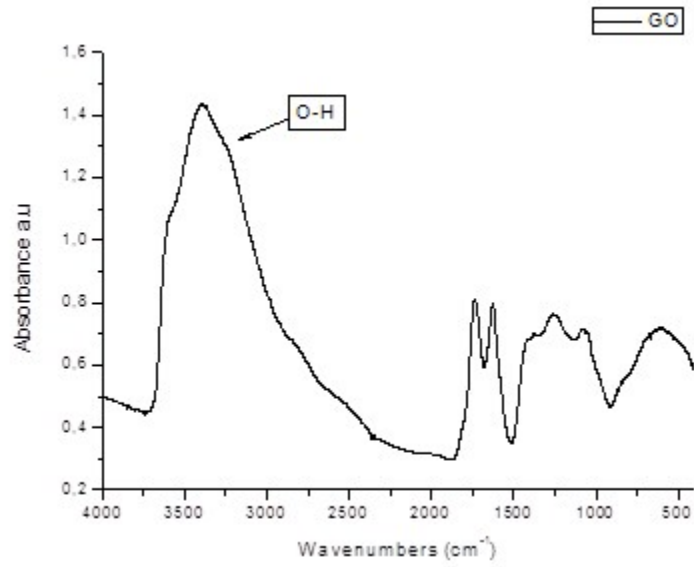

Figure S2 FT-IR spectrum of GO

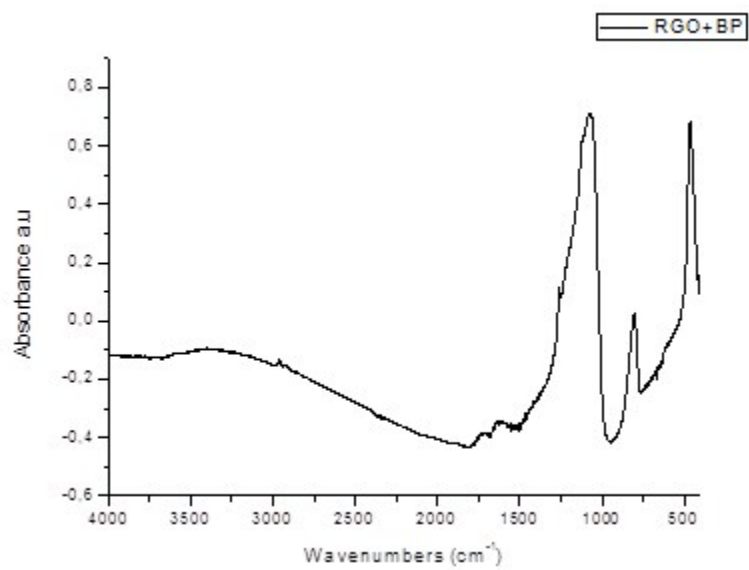

Figure S3 FT-IR spectrum of RGO+BP

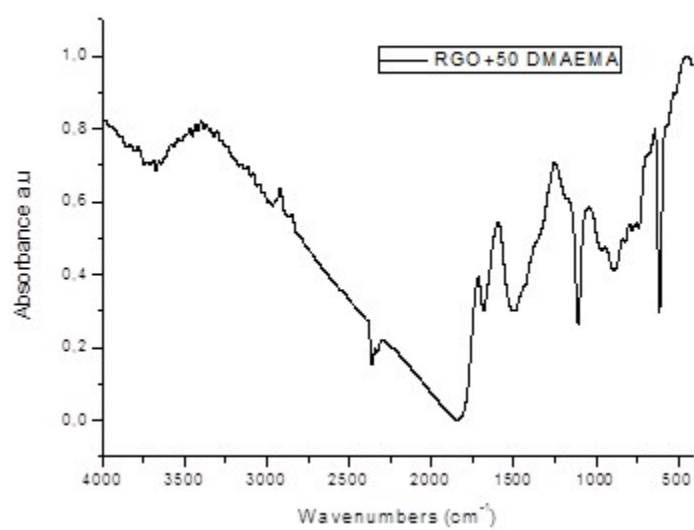

Figure S4 FT-IR spectrum of RGO+50DMAEM

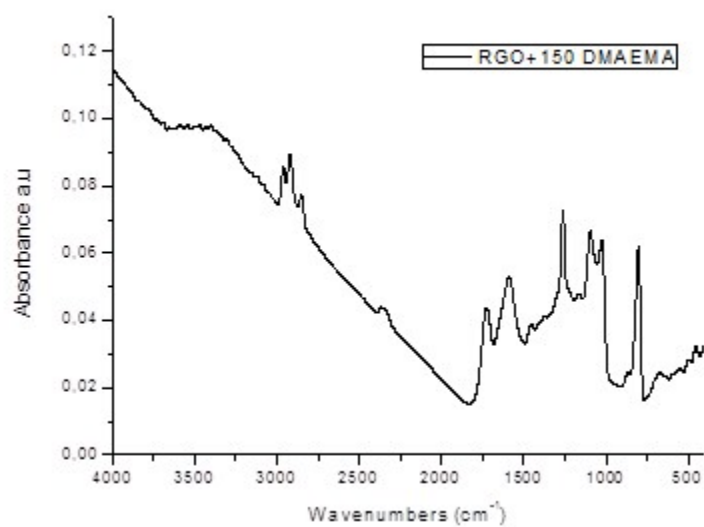

Figure S5 FT-IR spectrum of RGO+150DMAEM

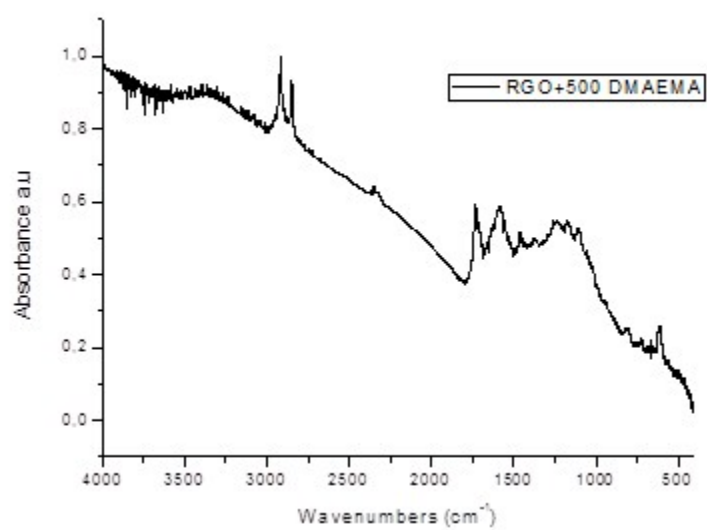

Figure S6 FT-IR spectrum of RGO+500DMAEM

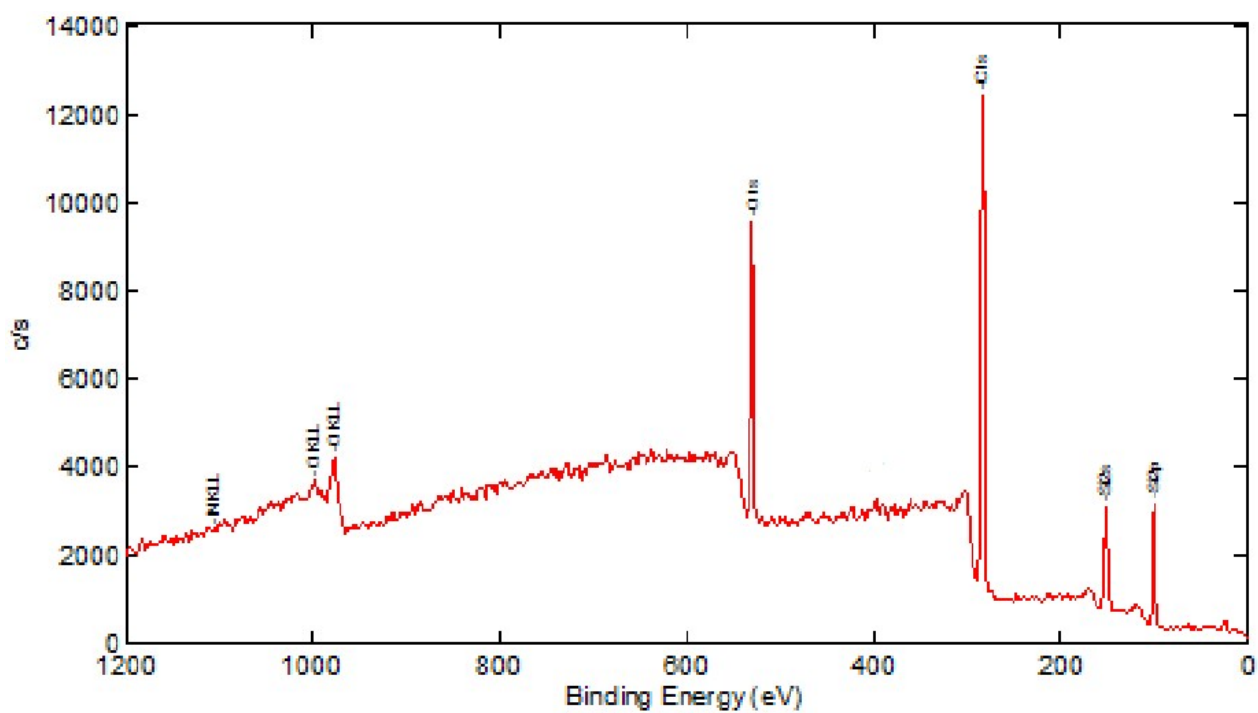

Figure S7 XPS survey spectrum of RGO+BP sample.

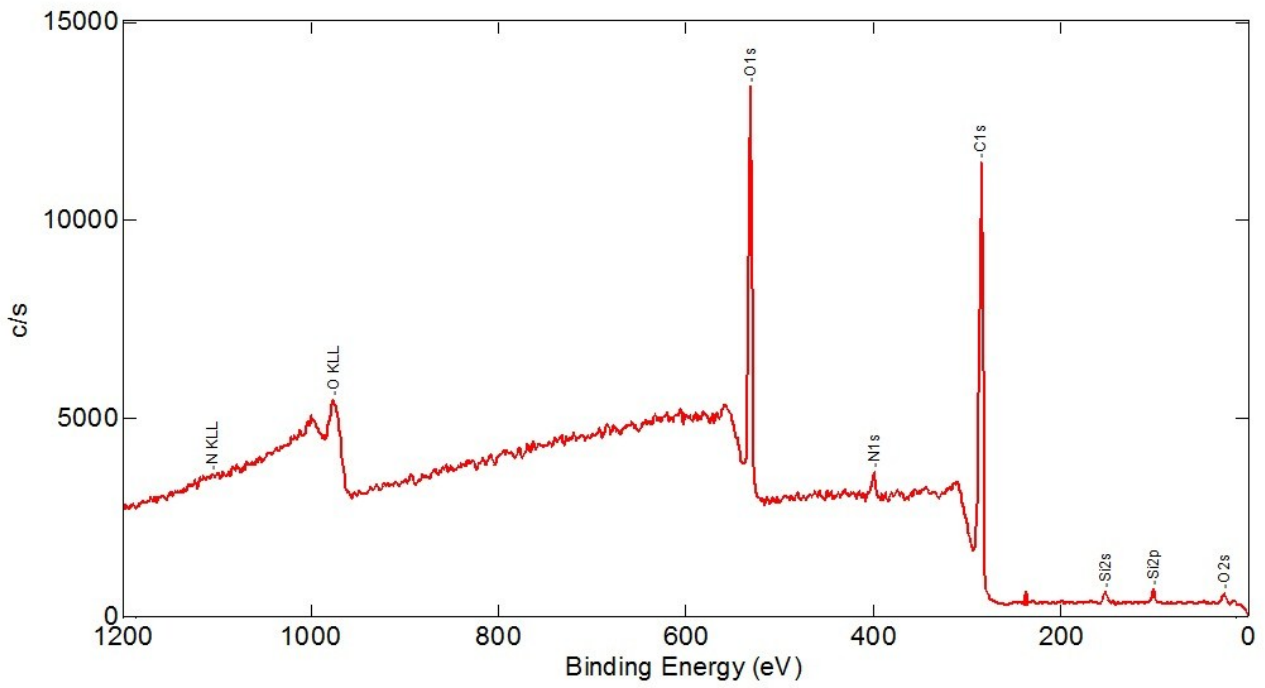

Figure S8 XPS survey spectrum of RGO+50DMAEM sample.

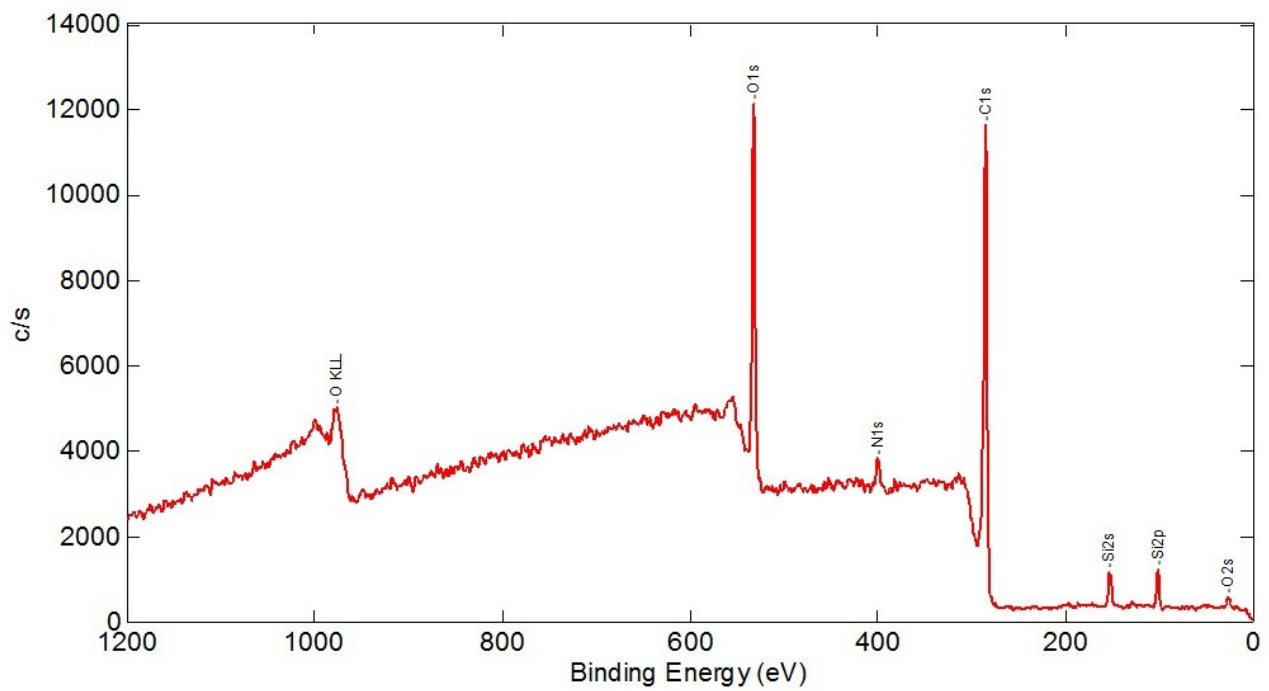

Figure S9 XPS survey spectrum of RGO+150DMAEM sample.

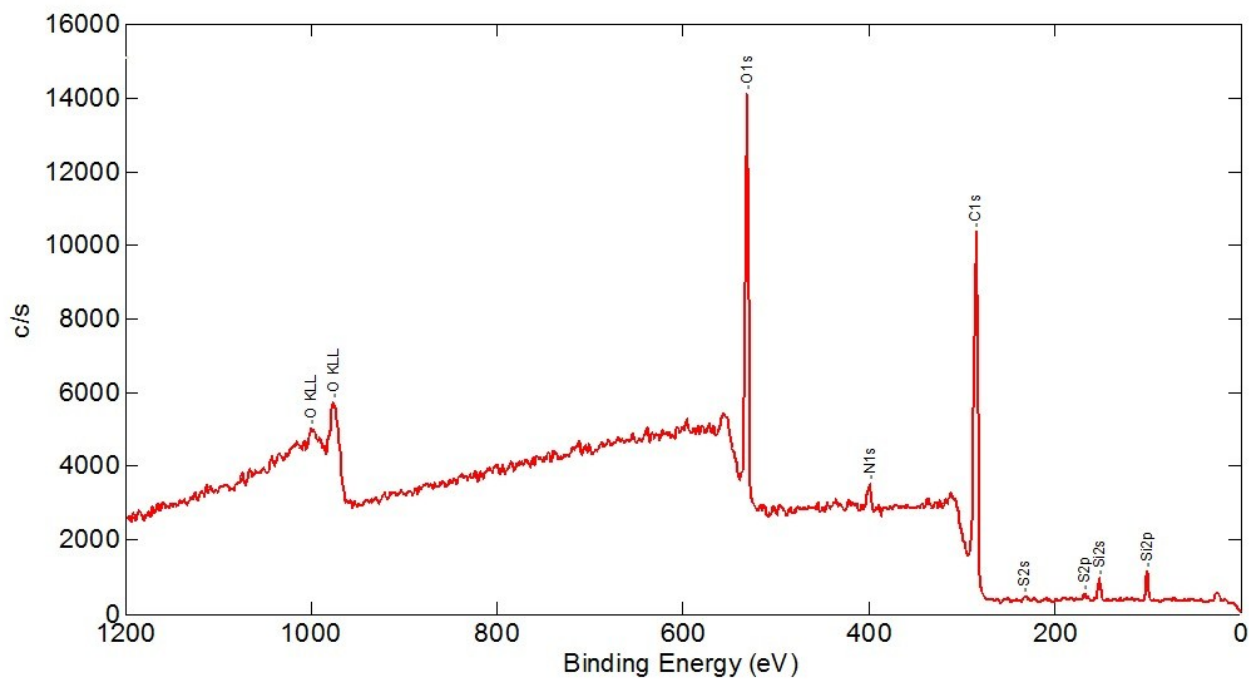

Figure S10 XPS survey spectrum of RGO+500DMAEM sample.

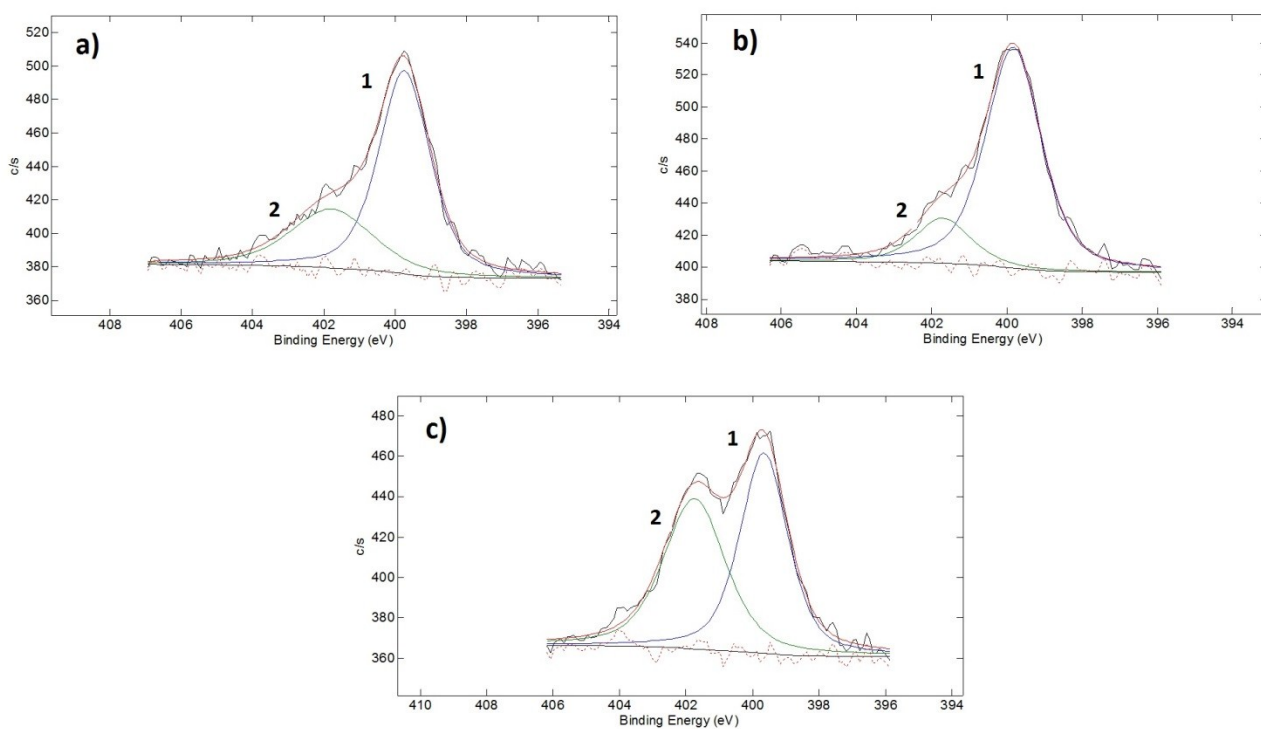

Figure S11 XPS spectra of N1s of (a) RGO+50 DMAEM, (b) RGO+150 DMAEM, (c) RGO+500 DMAEM.

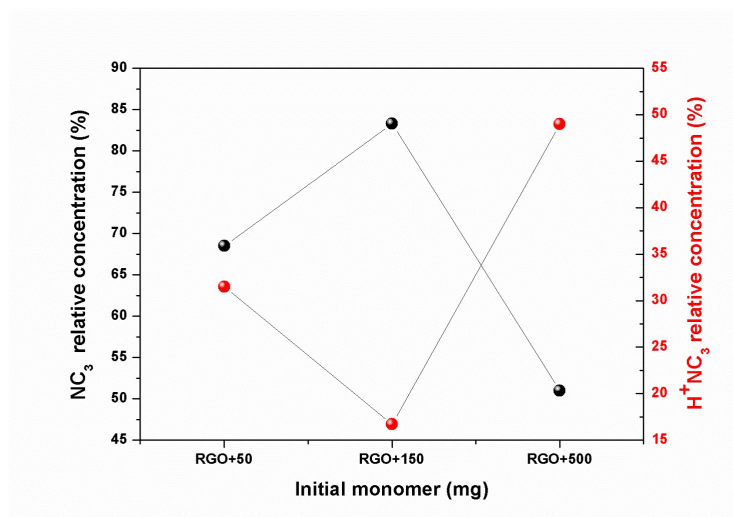

Figure S12 XPS relative concentration of NH<sub>2</sub> and NH<sub>3</sub><sup>+</sup> from N1s HR spectra of RGO+50 DMAEM, RGO+150 DMAEM and RGO+500 DMAEM

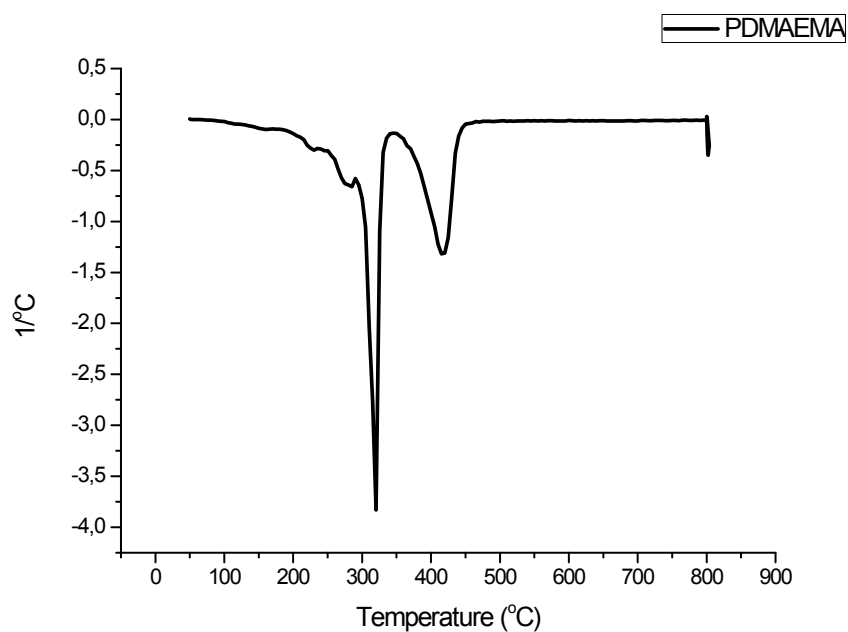

Figure S13 DTGA of Poly((dimethylamino) ethyl methacrylate).

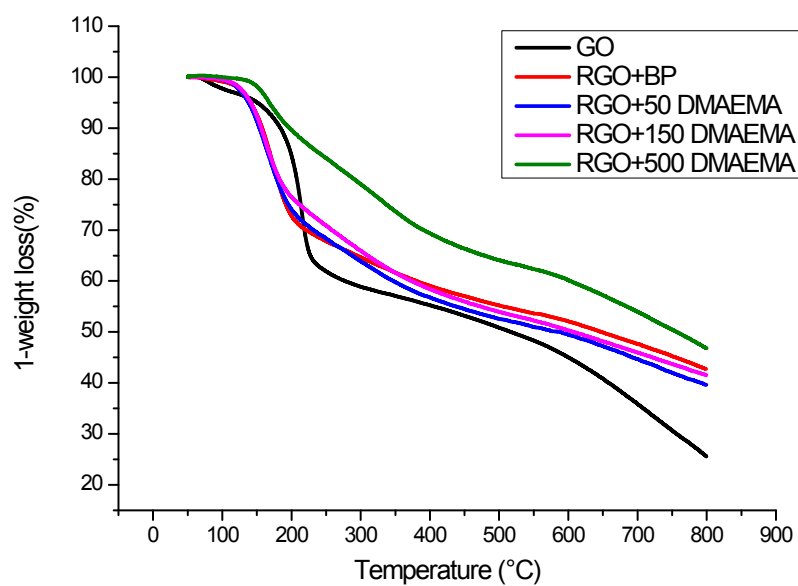

Figure S14 TGA curves comparison of samples synthesized.

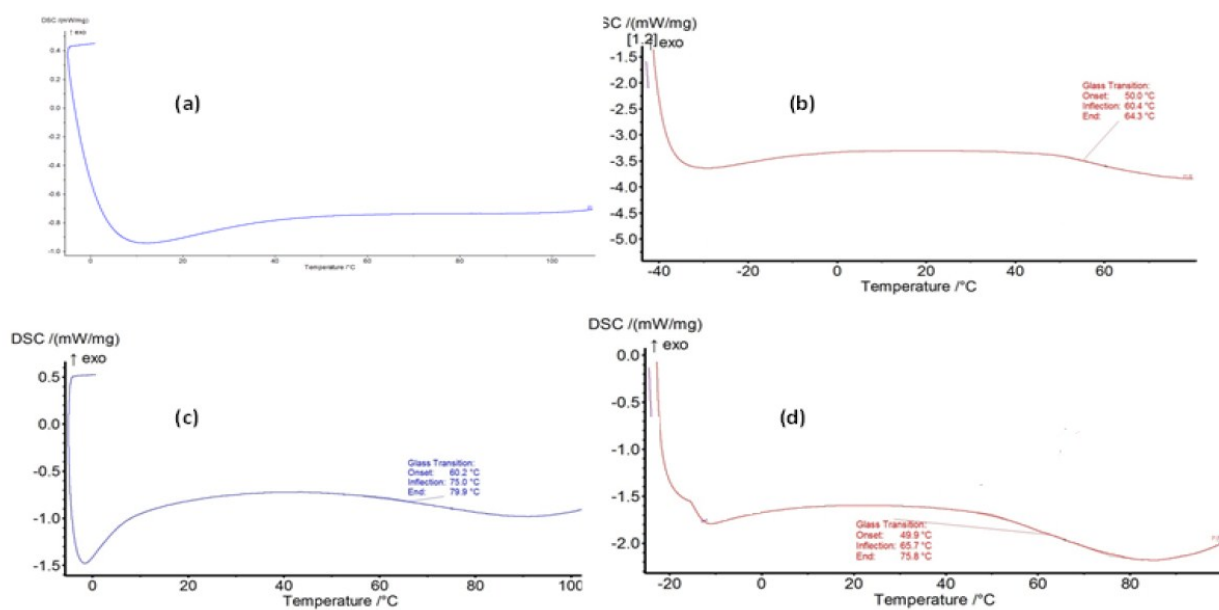

Figure S15 DSC curves of (a) RGO+BP (b) RGO+50 DMAEM, (c) RGO+150 DMAEM, (d) RGO+500 DMAEM.



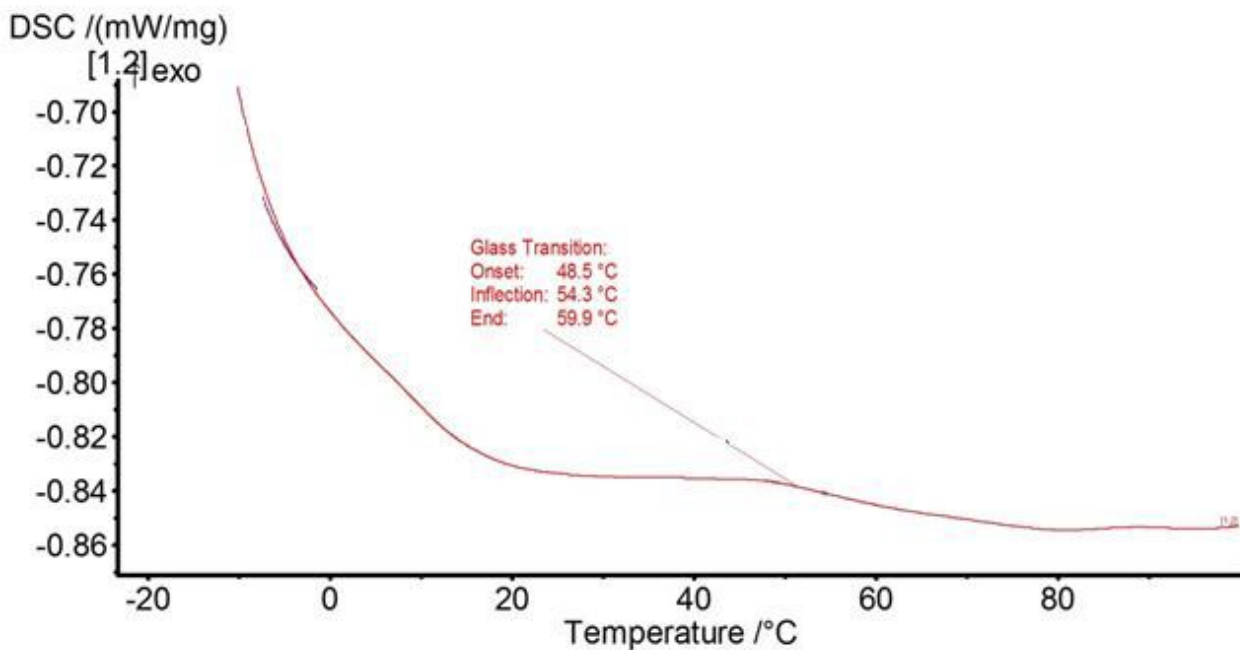

Figure S16 DSC of PDMAEM homopolymer

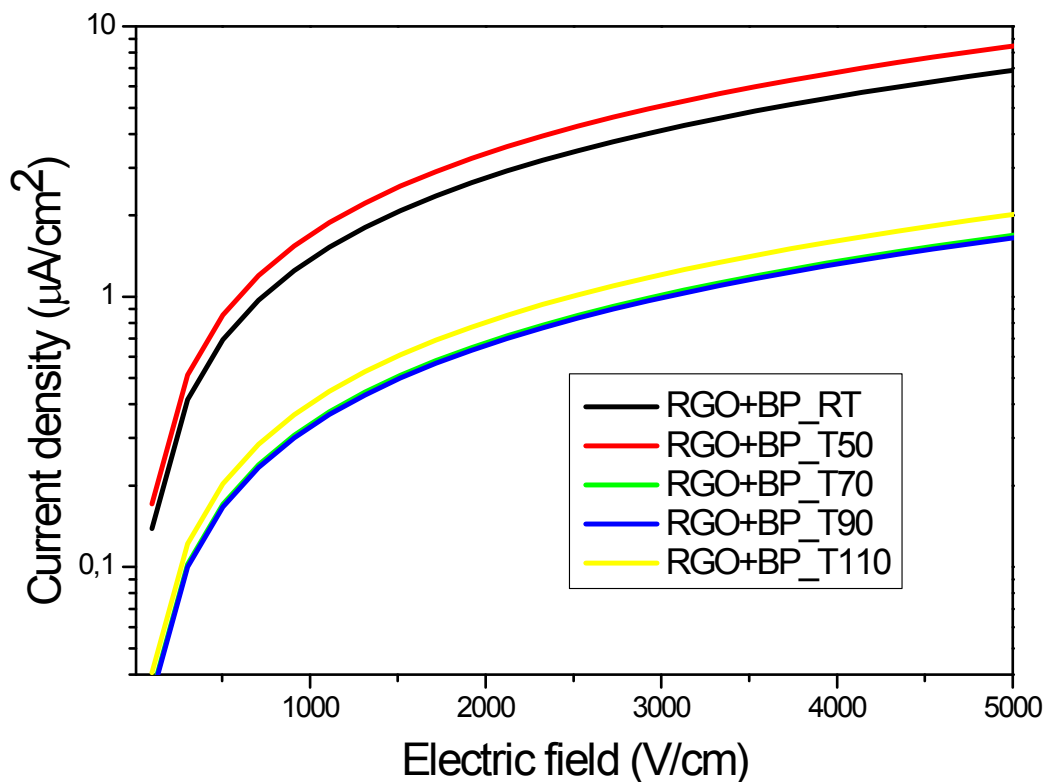

Figure S17 I-V curves of the RGO+BP after thermal treatments at different temperatures at room temperature

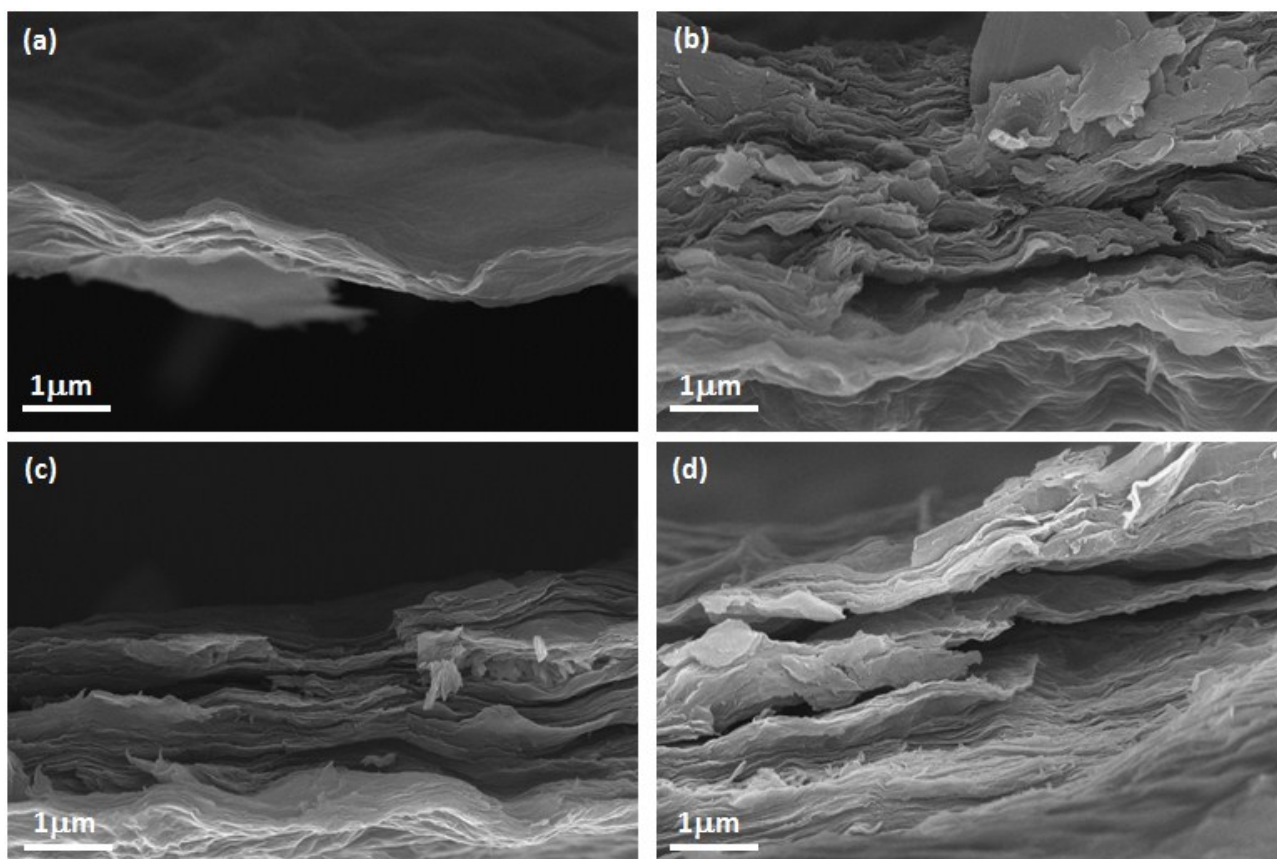

Figure S18 Cross-section FESEM images of (a) RGO+BP (b) RGO+50 DMAEM, (c) RGO+150 DMAEM, (d) RGO+500 DMAEM papers

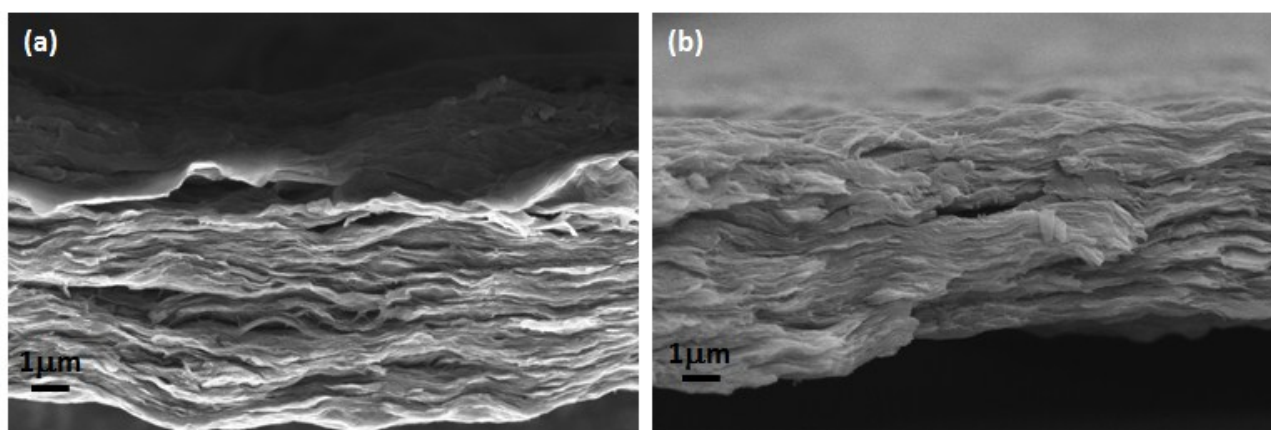

Figure S19 Cross-section FESEM images of (a) RGO+50 DMAEM, (b) RGO+500 DMAEM papers after thermal treatment at 110 °C

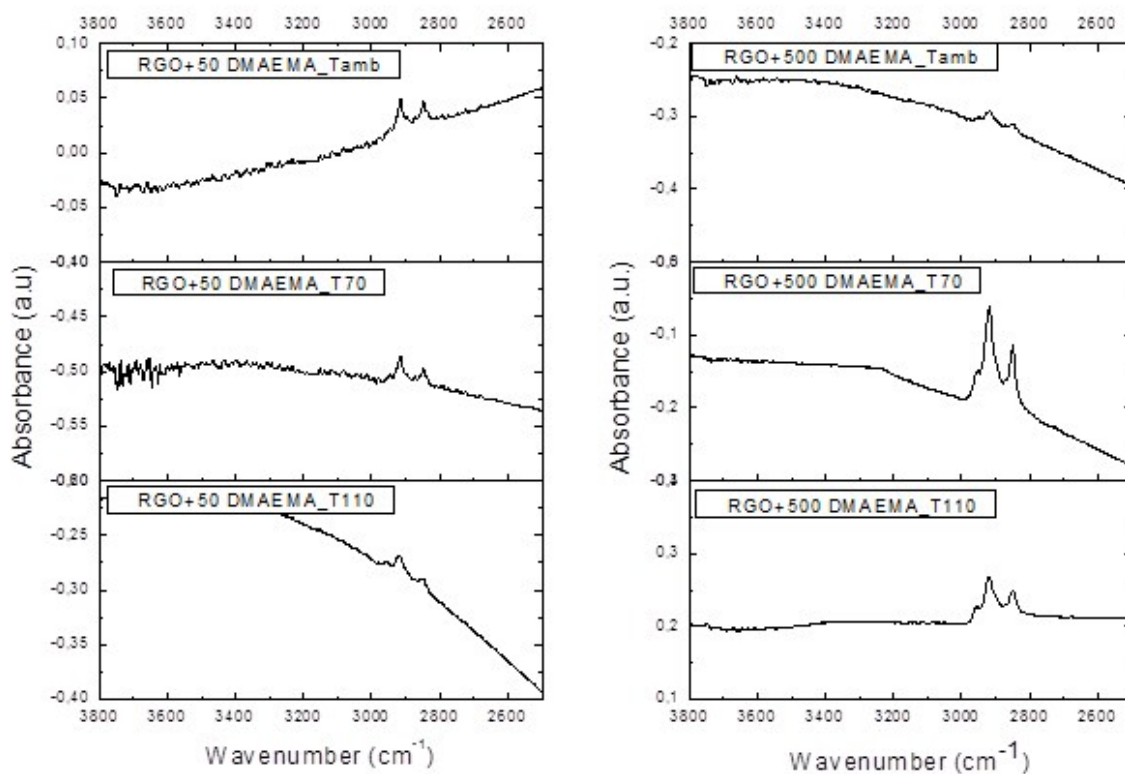

Figure S20 FT-IR spectra comparison of RGO+50 DMAEM (left) and RGO+500 DMAEM (right) after thermal treatments at different temperatures.
